# Supplementary material for: Challenges to <em>Cannabis sativa </em>Production from Pathogens and Microbes – the Role of Molecular Diagnostics and Bioinformatics
Source: Preprints.org preprint supplement (doi:10.20944/preprints202310.1852.v1), 2023-10-30
Supplement: Supplementary file 3 [file supplementary]

**Supplementary Table 1**. Universal degenerate primers and species-specific primers to a range of viruses and virus groups that were tested in this study on cannabis leaf tissues.

| 357-358 | Tob-Uni 1 | ATTTAAGTGGASGGAAAAVCACT | 10 min @ 95°C | 60s @ 95°C  60s @ 50°C  60s @ 72°C |
| --- | --- | --- | --- | --- |
| Tob-Uni 2 | GTYGTTGAGTTCATGGA |
| 722-723 | Nepo univ A-F  Nepo univ A-R | ACDTCWGARGGITAYCC | 10 min @ 95°C | 60s @ 94°C  60s @ 50°C  60s @ 72°C |
| RATDCCYACYTGRCWIGGCA |
| 891-892 | TuRSV RNA1 Sp1F | TCGCAGGCTAGAAGAGT | 10 min @ 95°C | 60s @ 95°C  60s @ 50°C  60s @ 72°C |
| TurSV RNA1 Sp2R | GGCCCTAAGTGTTCCTG |
| 783-784 | Ilar1F5  Ilar1R7 | GCNGGWTGYGGDAARWCNAC | 10 min @ 95°C | 30s @ 94°C  30s @ 48°C  30s @ 72°C  for 40 cycles |
| AMDGGWAYYTGYTYNGTRTCACC |
| 749- 750 | Cuc CPTALL-5 F | YASYTTTDRGGTTCAATTCC | 10 min @ 95°C | 60s @ 94°C  60s @ 48°C  60s @ 72°C  for 40 cycles |
| Cuc CPTALL-3 R | GACTGACCATTTTAGCCG |
| 770-771-772 | TobN-Univ-up3 | GGCGYTGCARACIATHGTITAYCA | 10 min @ 95°C | 20s @ 94°C  15s @ 51°C  5s @72°C  for 2 cycles  20s @ 94°C  15s @ 61°C  5s @72°C  for 26 cycles |
| TobN-Univ-do4 | GTRTTICCIATRAAIGTIGTIACRTC |
| TobN-Univ-do4G | GCCGATRAAGGTGGTGACRTC |
| 846-847 | AMV- F  AMV-coat-R | GTGGTGGGAAAGCTGGTAAA | 10 min @ 95°C | 45s @ 94°C  45s @ 50°C  45s @ 72°C  for 35 cycles |
| CACCCAGTGGAGGTCAGCATT |
| 628-629 | Potyvirus univ – Nib2F | GTITGYGTIGAYGAYTTYAAYAA | 10 min @ 95°C | 45s @ 94°C  45s @ 52°C  45s @ 72°C  for 36 cycles |
| Potyvirus univ – Nib3R | TCIACIACIGTIGAIGGYTGNCC |

**Supplementary Table 2**. Quality characteristics of RNA isolated from seven genotypes of cannabis.

| **Sample ID** | **ng / µL** | **260/280** | **260/230** |
| --- | --- | --- | --- |
| PDH | 199.23 | 1.98 | 1.55 |
| PD | 184.92 | 2.07 | 1.91 |
| Mac-1 | 82.07 | 2.10 | 2.20 |
| PK | 232.67 | 2.09 | 1.98 |
| BC | 115.54 | 2.07 | 1.02 |
| CBD | 77.42 | 2.14 | 2.15 |
| G54-2 | 253.73 | 2.08 | 2.23 |
|  |  |  |  |
